# Supplementary material
Source: Springer Nature journal article supplement (https://www.springermedizin.de/resource/supplementary/12967_2007_192_MOESM1_ESM.pdf/9575900)

a) VEGF

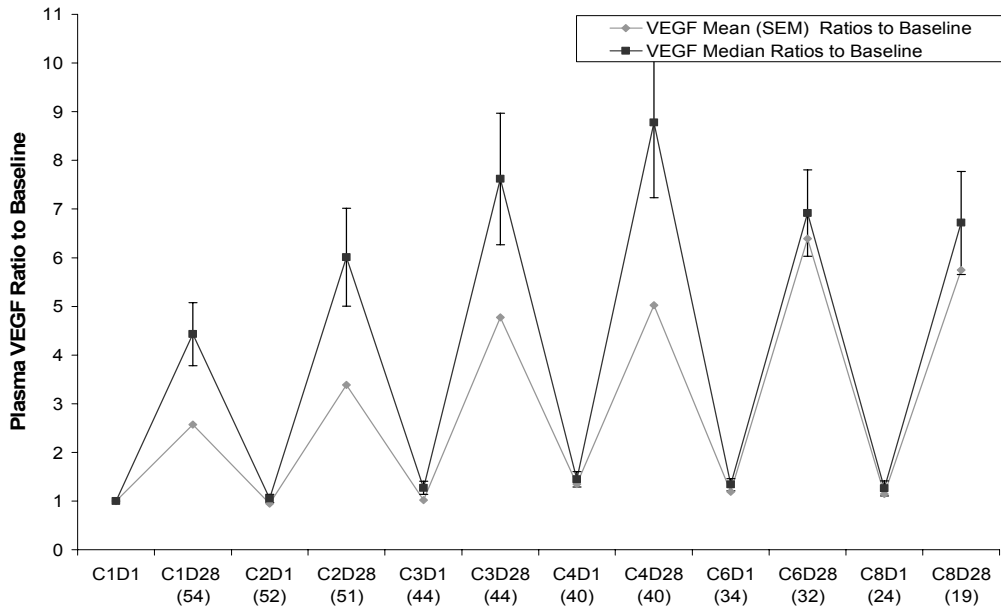

b) sVEGFR-2

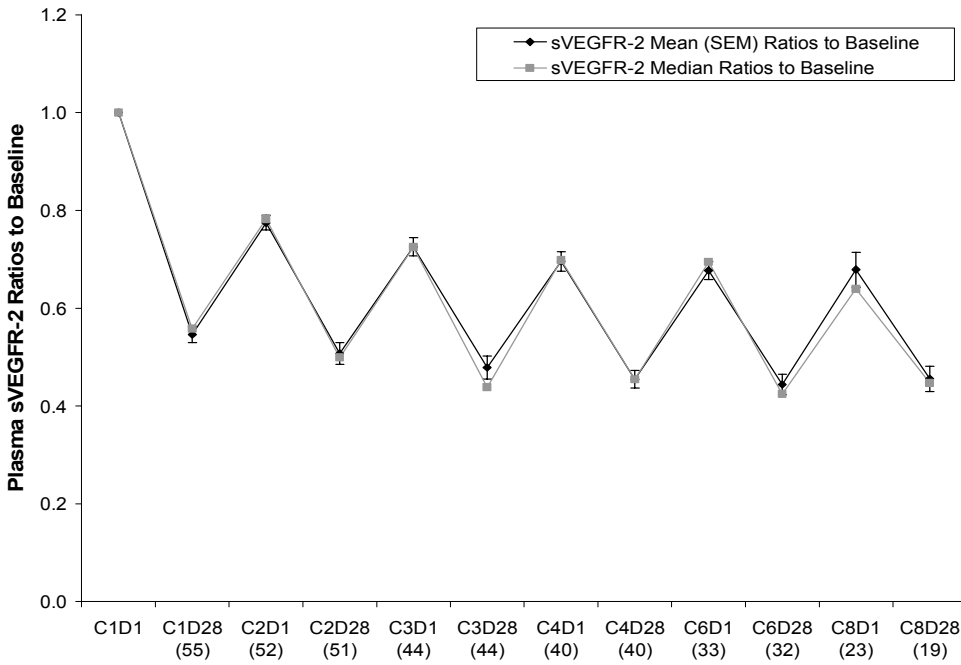

c) PIGF

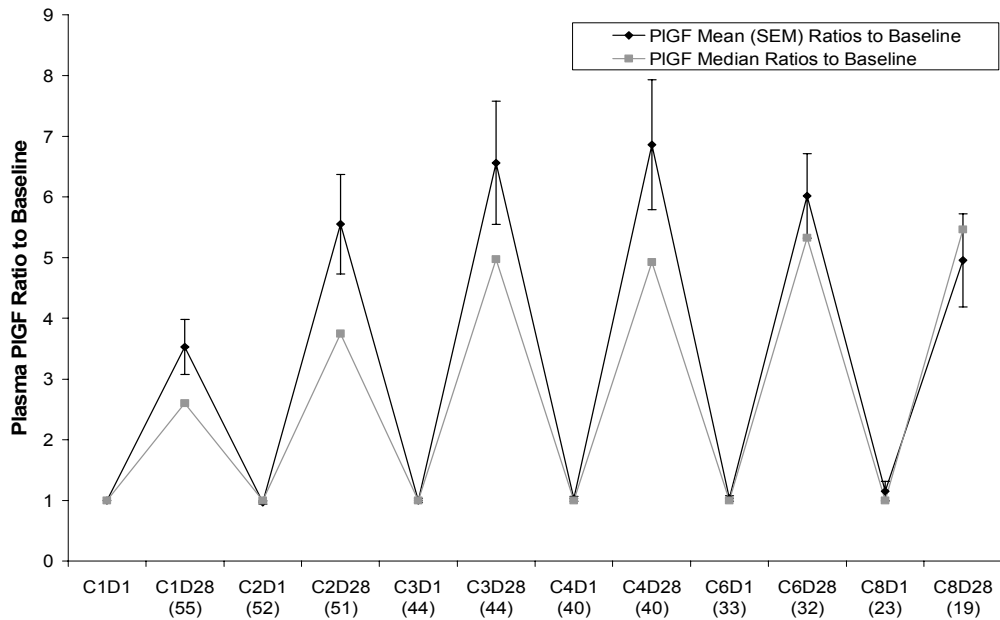

Supplement: MOESM1 [file 9575900]
